# Supplementary material for: Programming Effects of Prenatal Glucocorticoid Exposure with a Postnatal High-Fat Diet in Diabetes Mellitus
Source: PubMed Central journal article supplement (PMC4848989; doi:10.3390/ijms17040533), 2016-04-08
Supplement: ijms-17-00533-s001.pdf [file ijms-17-00533-s001.pdf]

## Supplementary Materials: Programming Effects of Prenatal Glucocorticoid Exposure with a Postnatal High-Fat Diet in Diabetes Mellitus

Jiunn-Ming Sheen, Chih-Sung Hsieh, You-Lin Tain, Shih-Wen Li, Hong-Ren Yu, Chih-Cheng Chen, Miao-Meng Tiao, Yu-Chieh Chen and Li-Tung Huang

Table S1. Nutritional composition of high fat (HFD) and standard diets.

| HFD (D12330)                          | Gm %   | Kcal % | Standard Diet                         | Gm %   | Kcal % |
|---------------------------------------|--------|--------|---------------------------------------|--------|--------|
| Protein                               | 23.0   | 16.4   | Protein                               | 16.8   | 16.4   |
| Carbohydrate                          | 35.5   | 25.5   | Carbohydrate                          | 74.3   | 73.1   |
| Fat                                   | 35.8   | 58.0   | Fat                                   | 4.8    | 10.5   |
| Total                                 | –      | 100    | Total                                 | –      | 100    |
| Kcal/gm                               | 5.56   | –      | Kcal/gm                               | 4.07   | –      |
| Ingredients                           | gm     | kcal   | Ingredients                           | gm     | kcal   |
| Casein, 30 Mesh                       | 228    | 912    | Casein, 30 Mesh                       | 228    | 912    |
| DL-Methionine                         | 2      | 0      | DL-Methionine                         | 2      | 0      |
| Maltodextrin 10                       | 170    | 680    | Maltodextrin 10                       | 170    | 680    |
| Corn Starch                           | 175    | 700    | Corn Starch                           | 835    | 3340   |
| Sucrose                               | 0      | 0      | Sucrose                               | 0      | 0      |
| Soybean Oil                           | 25     | 225    | Soybean Oil                           | 25     | 225    |
| Coconut Oil, Hydrogenated             | 333.5  | 3001.5 | Coconut Oil, Hydrogenated             | 40     | 360    |
| Mineral Mix S10001                    | 40     | 0      | Mineral Mix S10001                    | 40     | 0      |
| Sodium Bicarbonate                    | 10.5   | 0      | Sodium Bicarbonate                    | 10.5   | 0      |
| Potassium Citrate, 1 H <sub>2</sub> O | 4      | 0      | Potassium Citrate, 1 H <sub>2</sub> O | 4      | 0      |
| Vitamin Mix V10001                    | 10     | 40     | Vitamin Mix V10001                    | 10     | 40     |
| Choline Bitartrate                    | 2      | 0      | Choline Bitartrate                    | 2      | 0      |
| FD&C Blue Dye #1                      | 0.05   | 0      | FD&C Yellow Dye #5                    | 0.1    | 0      |
| FD&C Red Dye #4                       | 0.05   | 0      |                                       |        |        |
| Total                                 | 1000.1 | 5558.5 |                                       | 1366.6 | 5557   |
